# Supplementary material
Source: PubMed Central journal article supplement (PMC2890456)
Supplement: 0914177107_sapp.pdf [file 0914177107_sapp.pdf]

## Supporting Information

### Ecosystem Protection and Poverty Alleviation

Kwaw S. Andam,<sup>1\*</sup> Paul J. Ferraro,<sup>2\*</sup> Katharine R. E. Sims,<sup>3\*</sup> Margaret B. Holland,<sup>4</sup> and Andrew Healy<sup>5</sup>

<sup>1</sup> International Food Policy Research Institute, 2033 K Street, NW, Washington, DC 20006-1002, USA

<sup>2</sup> Department of Economics, Andrew Young School of Policy Studies, Georgia State University, PO Box 3992, Atlanta, GA 30302-3992, USA

<sup>3</sup> Department of Economics and Environmental Studies Program, Amherst College, PO Box 5000, Amherst, MA 01002, USA

<sup>4</sup> Land Tenure Center, Nelson Institute for Environmental Studies, University of Wisconsin-Madison, 550 N. Park St, Madison, WI 53706, USA; Science & Knowledge Division, Conservation International, Suite 500, 2011 Crystal Drive, Arlington, VA 22202, USA

<sup>5</sup> Department of Economics, 1 LMU Drive, Loyola Marymount University, Los Angeles, CA 90045, USA

\* These authors contributed equally to this work.

To whom correspondence should be addressed. E-mail: [pferraro@gsu.edu](mailto:pferraro@gsu.edu) (P.J.F.); [ksims@amherst.edu](mailto:ksims@amherst.edu) (K.R.E.S.)

## SI Text

### Data

**Unit of observation.** In the Costa Rica analysis, the unit of analysis is the census segment (*segmento censal*), which is akin to a census tract. It is the smallest census unit for which we have comparable census data in 1973 and 2000. Each census segment represents between forty to sixty households. Due to the increase in population and number of households between each census, the relative size and number of segments shifted considerably between both census years. Therefore, we faced the challenge of reconciling segment geography from the two periods. We overcome this challenge by using an areal interpolation technique known as areal weighting (1, 2). Using the TwoThemes extension developed for ArcView®, we aggregated 2000 census data to the 1973 segment boundaries, and disaggregated 1973 census data to the 2000 segment boundaries.

Areal interpolation assumes spatial homogeneity within the unit of analysis. We believe it is more accurate to assume spatial homogeneity for the 2000 census segments than to do so for the 1973 census segments because the 2000 segments are smaller in size. Thus our main dataset uses 1973 census segment boundaries, with all census data from 2000 aggregated to the census segment geography of the 1973 segments. Two segments were excluded because there were no 1973 census data for them<sup>\*</sup>. We test the robustness of our estimates by repeating our analyses with the 1973 census data disaggregated to match the 2000 census segments (see ‘Other Robustness Checks’).

---

<sup>\*</sup> We have anecdotal evidence from INEC that these two segments were not surveyed in 1973 because there were no residents within those segments at that time.

**In the Thailand analysis,** the unit of analysis is a subdistrict ("tambon"). In descending order of size, Thailand has administrative units of "province," "district," "subdistrict," and "village." The sample consists of subdistricts in the North and Northeast regions, where the majority of protected forest areas are located. We exclude subdistricts that are less than 10 km away from a major city (population > 100,000; all of these cities had been established by the 1960's). The average size of a subdistrict in the sample is 74 sq km; the average population is 5043.

**Outcomes.** The poverty measures used in the analysis are country-specific. The Costa Rica analysis uses a relative poverty measure in which census tracts are compared to each other, not an absolute standard like \$1/day. The Thailand analysis uses an absolute standard based on consumption, which is the Thai government definition of the poverty line, rather than an international standard. Thus in both cases we use measures that are more akin to defining poverty as “a socially-specific concept, whereby the consumption needs for escaping poverty in a given society depend on what people generally consume in that society” (3). We believe this notion of poverty is the most policy-relevant notion for nations contemplating maintaining or expanding protected areas (in contrast to, for example, an international poverty line). For additional background on the measurement of poverty in general, see (3-5).

**In the Costa Rica analysis,** we analyze the effects of protection on a poverty index derived from data common to the 1973 and 2000 population and housing censuses. The poverty index was obtained by using principal components analysis (PCA). The first principal component, that which captures the most variance among the combination of factors, is used to construct the index: factor scores from the first component are used as weights for each variable,

which are then combined into a single index score. Cavatassi et al. (6) used PCA in developing a time-variant poverty index for Costa Rica at the third administrative, or district, level. They selected PCA because it can focus solely on census data, is flexible for constructing an index of change over time, is relatively inexpensive and easy to calculate once the data are compiled, and has been used in several countries with results comparable to those of consumption-based welfare indicators (7, 8).

The 16 variables included in the poverty index are described in table S3. To the greatest extent possible, we use the same set of variables as Cavatassi et al. As noted in their report, the variables in their analysis have been found in other studies to be associated with poverty in Costa Rica. We adjust some variables to align them with the index of unsatisfied basic needs (UBN), part of Costa Rica's own national poverty mapping efforts. To make the indexes comparable over time, we follow Cavatassi et al. by pooling the data for 1973 and 2000 before applying the PCA to generate weights for estimating the poverty index.

**Socioeconomic outcomes for Thailand** are from a poverty mapping analysis by Healy and Jitsuchon (9), applying the poverty mapping methodology developed by Elbers et al. (10). In general, poverty mapping involves estimating poverty for small areas by combining data from household consumption/expenditure surveys, which are detailed but have limited coverage, and census surveys, which contain only basic information on household characteristics but have comprehensive geographic scope. In the Thai case, household income and consumption for the households in the 2000 Thai Socio-Economic Survey are modeled as a function of household characteristics and assets for which the Census contains data for 20% of all Thai households (9). These relationships are then used to predict household income and consumption for all households in the Census. By running simulations and aggregating across households, this

method can generate precise estimates of poverty down to the subdistrict level. Poverty mapping techniques have been demonstrated with reasonable accuracy by comparison to known true small-area values (10, 11). Concerns about precision (see report by Banerjee et al. (12) and response by Lanjouw and Ravallion (13)) are not a major concern given that poverty is used here as the outcome variable.

The poverty measurements used in this analysis are the poverty headcount ratio and poverty gap, which are part of the Foster-Greer-Thorbecke (FGT) family of poverty measures (14). The poverty headcount ratio (FGT0) is the share of the population with consumption below the poverty line. The poverty gap (FGT1) modifies this measure by weighting for how far households' consumption falls below the poverty line.

***Treatment.*** The treatment and control units are defined in the main text. The number of protected areas in the analysis is listed in table S4 by International Union for Conservation of Nature (IUCN) categories. Detailed descriptions of the historical process of establishing protected areas are provided elsewhere for both Costa Rica (15) and Thailand (16) and are therefore not repeated here.

***Covariates.*** We control for covariates that could potentially confound the estimation of the effects of protection. We confirmed the narrative and empirical evidence that these variables also affect the designation of protected areas by modeling the selection process directly using our data and a probit model (regressing a dummy variable for treatment on the covariates).

**For the Costa Rica analysis,** we control for the following covariates in the matching analysis:

*Proportion of segment under forest cover in 1960 area*: This is the earliest measure of forest cover prior to the establishment of protected areas. *“Road-less volume”*: Road-less volume is a metric that measures accessibility to transportation infrastructure (17). The road-less volume for a census segment is obtained by multiplying the distance from center of each 100 square meter plot in the segment to nearest major road in 1969, and then summing for all plots within the segment. *Land use capacity*: We use Costa Rica’s *land use capacity classes*, which are determined by slope, soil characteristics, life zones (18), risk of flooding, dry period, fog, and wind influences (19). The classes are defined in table S1. *Distance to nearest major city*: This variable is a measure of proximity to large agricultural markets. Following a similar Costa Rican study (20), we use as proxies for access to agricultural markets the three major cities: Limon, Puntarenas, and San Jose. *Baseline poverty index in 1973*: This index is derived as described above in section entitled “Outcomes.”

The choice of variables **for the Thailand analysis** draws on qualitative research into the history of the process of designation for protected areas in Thailand (16). Areas in Thailand were more likely to be protected if they were important for national watershed protection, were further from high quality agricultural land, were forested on historical land use maps, and were further from mineral and timber resources (16). All of these factors are also likely to affect socioeconomic outcomes. Control variables were therefore chosen that could best proxy for these factors. The sources of these data are described in table S2. Fixed geographic controls include: *average and maximum slope and elevation, distance to Thai national boundary, distance to navigable river, distance to mineral deposits, eco-region, average temperature and rainfall, and upper watershed status*. Pre-treatment characteristics include *historical forest cover (measured in 1973), distance to major and minor roads in 1962, distance to railroad line, and distance to*

*major city* (these major cities were established in the 1960's). Unfortunately, data on population or poverty measures at the subdistrict level are not available for earlier time periods in Thailand (these are available at the district level but would be redundant with district level fixed effects). Because Thailand was primarily an agricultural country throughout this period, forest cover serves as the best available control for prior level of development. To control for unobservable differences in political/institutional characteristics or initial regional development, we use exact matching at the district level.

## Methods

In statistical jargon, the socioeconomic effects of protected areas that we attempt to measure are the Average Treatment Effect on the Treated (ATT). The methods of matching provide one way to estimate the ATT when protection is influenced by observable characteristics and the analyst wishes to make as few parametric assumptions as possible about the underlying structural model that relates protection to the socioeconomic outcomes (e.g., the poverty index). Matching works by, *ex post*, identifying a comparison group that is “very similar” to the treatment group with only one key difference: the comparison group did not participate in the program of interest (21-23). If the researcher can select observable characteristics so that any two census communities with the same value for these characteristics will display homogenous responses to the treatment (i.e., protection is independent of outcomes for similar communities), then the treatment effect can be measured without bias. Mathematically, the key assumption is:

$E[Y(0) | X, T = 1] = E[Y(0) | X, T = 0] = E[Y(0) | X]$  and  $E[Y(1) | X, T = 1] = E[Y(1) | X, T = 0] = E[Y(1) | X]$ , where  $Y_i(1)$  is the outcome when community  $i$  is protected,  $Y_i(0)$  is the outcome when community  $i$  is unprotected,  $T$  is treatment ( $T=1$  if protected), and  $X$  is the set of pretreatment characteristics on

which communities are matched. This is called the conditional independence assumption and its implication is that, conditional on  $X$ , the outcomes and treatment are independent. In the context of our analyses, this assumption implies that, after conditioning on a set of observable characteristics, poverty outcomes are independent of protected area assignment (as would be the case if protected areas were randomly assigned across the landscape). For identification purposes, we also need one other assumption called the overlap assumption:

$c < P(T = 1 | X = x) < 1 - c$  for  $c > 0$ . This assumption implies that the conditional distributions of the treated and control units overlap for the vector of covariates  $X$ . This assumption is required for identification, because if all communities with a given vector of covariates were protected, there would be no observations on similar unprotected communities.

The matching methods used in the analysis are described in the main text. Table S5 presents the **covariate balancing results for Costa Rica** when matching without calipers. The table includes three measures of the differences in the covariate distributions between protected and unprotected segments: the difference in means, measures of the distance between the two empirical quantile functions (values greater than 0 indicate deviations between the groups in some part of the empirical distribution), and the mean difference in the empirical cumulative distribution (to compare relative balance across the covariate dimensions). If matching is effective, these measures should move dramatically towards zero (24). The measures in the fifth to ninth columns indeed move dramatically towards zero after matching (we present the matching method that yields the best covariate balance). Covariate balance is even more improved when matching with calipers, particularly on the road-less volume where the difference in mean values falls to  $59.5 \text{ km}^3$  (full balancing results available from authors).

Table S6 presents the **covariate balancing results for Thailand** when matching without calipers. As in the Costa Rican case, matching substantially improves the covariate balance on all covariates. To save space, balancing results with calipers are not shown; balance improves with calipers, as expected.

Table S7 presents the impact estimates from Fig 3 in the main text in a more explicit tabular format. Table S7 also presents impact estimates using the poverty gap as the measure of poverty in Thailand. The poverty gap weights the poverty headcount by the distance separating the population from the poverty line. It therefore represents a measure of the amount of resources (cash transfers) that would be needed to eradicate poverty.

In the main text, we calculate relative impact measures. For Costa Rica, the 1973 mean poverty index for the 249 treatment segments is 15.050. In 2000, it is -1.588. Dividing the estimated treatment effect by the change in poverty index (16.64) implies that 7.7% of the poverty reduction observed in treated segments is estimated to be attributable to protected areas. For Thailand, we simply divide the estimate of the impact (0.079) by the mean poverty headcount ratio in the matched control subdistricts (0.282); this change corresponds to 28.0% of the counterfactual poverty level.

***Sensitivity to Hidden Bias.*** To determine how strongly an unmeasured confounding variable must affect selection into the treatment to undermine our conclusions, we use the bounds recommended by Rosenbaum (25). Although there are other sensitivity tests available (e.g., (26)), Rosenbaum's bounds are relatively free of parametric assumptions and provide a single, easily interpretable measure of the way in which the unobservable covariate enters.

If the probability of agent  $j$  selecting into the treatment is  $\pi_j$ , the odds are then  $\frac{\pi_j}{1-\pi_j}$ .

The log odds can be modeled as a generalized function of a vector of controls  $x_j$  and a linear unobserved term, so  $\log\left(\frac{\pi_j}{1-\pi_j}\right) = \kappa(x_j) + \gamma u_j$ , where  $u_j$  is an unobserved covariate scaled so that  $0 \leq u_j \leq 1$ . Take a set of paired observations where one of each pair was treated and one was not, and identical observable covariates within pairs. In a randomized experiment or in a study free of bias,  $\gamma = 0$ . Thus under the null hypothesis of no treatment effect, the probability that the treated outcome is higher equals 0.5. The possibility that  $u_j$  is correlated with the outcome means that the mean difference between treated and control units may contain bias.

The odds ratio between unit  $j$  which receives the treatment and the matched control outcome  $k$  is:  $\frac{\pi_j(1-\pi_k)}{\pi_k(1-\pi_j)} = \exp\{\gamma(u_j - u_k)\}$ . Because of the bounds on  $u_j$ , a given value of  $\gamma$  constrains the degree to which the difference between selection probabilities can be a result of hidden bias. Defining  $\Gamma = e^\gamma$ , setting  $\gamma = 0$  and  $\Gamma = 1$  implies that no hidden bias exists, and hence is equivalent to the conditional independence assumption underlying the matching method analysis. Increasing values of  $\Gamma$  imply an increasingly important role for unobservables in the selection decision. The differences in outcomes between the treatment and control are calculated. We contrast outcomes using matched units from the analysis with and without calipers. The Rosenbaum bounds test is then used to test the difference between the paired outcomes.

Rosenbaum bounds compute bounds on the significance level of the matching estimate as  $\Gamma = e^\gamma$  changes values. The intuitive interpretation of the statistic for different levels of  $\Gamma$  is that matched units may differ in their odds of being protected by a factor of  $\Gamma$  as a result of hidden

bias. The higher the level of  $\Gamma$  to which the difference remains significantly different from zero, the stronger the relationship is between treatment and post-treatment poverty. A study is considered highly sensitive to hidden bias if the conclusions change for  $\Gamma = e^\gamma$  just barely larger than 1, and insensitive if the conclusions change only for large values of  $\Gamma = e^\gamma > 1$  (25). Note that the assumed unobserved covariate is a strong confounder: an unobserved covariate, or set of them, that is a near perfect predictor of protected areas' effects on poverty, is closely associated with the spatial assignment of protection, and is uncorrelated with the other covariates for which we control in the analysis. Showing that a result is sensitive at a given level of  $\Gamma$  does not mean that this strong confounder exists and that protection has no impact.

### **Robustness Checks**

Tables S8 and S9 present the results of the tests of sensitivity to hidden bias. The upper half of table S8 presents the significance level (critical p-values) of the **Costa Rica estimates** as  $\Gamma$  increases. The upper halves of tables S9a and S9b present the significance levels of the **Thailand estimates** as  $\Gamma$  increases. In both the Costa Rica and Thailand contexts, the assumed powerful unobserved confounder would only have to be weakly associated with protection to render our estimates insignificantly different from zero.

We also examine the  $\Gamma$  at which the 95% confidence interval would include an effect of protection on poverty of a “moderate” effect size of 0.5 (27), but in the opposite direction (i.e., protection exacerbates poverty). In other words, we determine the levels of  $\Gamma$  at which the confidence interval would include a positive ATT with an effect size of 0.5. To estimate upper bounds on the confidence intervals as  $\Gamma$  increases, we calculate Rosenbaum bounds using the Wilcoxon test statistic, which can then be used to calculate confidence intervals as  $\Gamma$  increases

(28, 29). The lower half of table S8 indicates that, **for the matched Costa Rica sample** constructed without calipers,  $\Gamma$  would have to be as large as 3.4 for the confidence interval to include a value that implies a moderate exacerbation of poverty from protection. The  $\Gamma$  value would have to be as large as 4.7 for the Costa Rica sample constructed with calipers. **For the Thailand data**, the lower half of tables S9a and S9b indicates that  $\Gamma$  would have to be as large as 6.8 and 7.2 for the poverty headcount and poverty gap outcomes respectively when matching with no calipers (as large as 5.5 and 5.4 when matching with calipers). Thus only a very large amount of hidden bias could have caused us to estimate that protection had a small role in alleviating poverty when, in fact, protection may have had a moderate impact on exacerbating it. The omitted confounder would have to be one that increases the odds that a unit has more than 10% of its area protected by more than three-fold in Costa Rica and more than five-fold in Thailand.

The conclusions in the main text are also robust to alternative ways to control for imperfect matching, changes in the sample composition, changes in the matching specifications, and changes in the scale of the analysis. The estimates reported in the main text are our best estimates of the effects of protection on poverty. The robustness checks described below are not intended to increase the accuracy of our estimates, but rather to determine if alternative analyses would give estimates that would overturn our conclusions. We find they would not: under no robustness check do we draw the conclusion that protected areas exacerbated poverty.

***Post-matching Regressions.*** Successful matching makes treatment effect estimates less dependent on the specific post-matching statistical model (24). In the main text, we use Abadie and Imbens' post-matching bias-correction procedure to adjust for imperfect matching (30). An

alternative approach is to run post-matching Ordinary Least Squares (OLS) regressions on the matched samples. We report only the marginal effect estimates because hypothesis testing is not the purpose of this analysis, but rather to confirm Fig 1's estimates (Table S7) are robust to alternative model specifications.

Table S10 presents post-matching regression estimates **for Costa Rica**. We use a weighted OLS model of the poverty index outcome on the covariates. Each post-matching regression estimate thus corresponds to a matching estimate in Table S7. The post-matching regression estimates in the second column of table S10 are similar to the matching estimates in the main text.

We test model dependence further by running regressions using a modified set of covariates (i.e. we match on the core set and regress on elements of the modified set of variables). For the regression, we replace the *proportion of segment under forest in 1960* with the *area under forest in 1960*, replace the *proportion of the segment under each land use class* with the *area of the segment under each land use classes*, replace the *road-less volume* with the *distance to nearest road* (the distance from the centroid of the segment to a road in 1969), and we control for the *segment area* and *population density in 1973*. We report these estimates in the third column of table S10. We find that the post-matching regression estimates continue to differ little from those reported in table S7.

**The Thailand** post-matching regression results are in table S11. For example, in the first column and first row of table S11, we run a weighted OLS model of the poverty headcount ratio (2000) on the full set of covariates using the matched dataset from the matching procedure in the second column and first row of table S7. The post-matching regression estimates in table S11 are

similar to the matching estimates in table S7. Including district fixed effects (table S11, second row) also produces similar estimates although they are somewhat smaller in terms of magnitude.

***Population Effects.*** One rival explanation for our observed results is that protected areas displaced poor people to other segments or subdistricts, thereby making protection appear to alleviate poverty. To assess this rival explanation, we estimated the effect of protected areas on population. table S12 reports the estimated effects of protection on population density and growth rates in Costa Rica (growth rate is the population in 2000 minus the population in 1973, which is then divided by the population in 1973), and the Thailand results from matching for protection's impact on population density. All population estimates are small and statistically indistinguishable from zero ( $p > 0.10$ ), with the exception of the estimate on population growth for Costa Rica (matching with no calipers) which is not a robust estimate<sup>†</sup>.

***Other robustness checks.***

*Changing the scale of the unit of observation (Costa Rica):* Instead of using the aggregated segment boundaries (1973 census boundaries), we use the disaggregated segment boundaries (2000 census boundaries). The difference in these two scales is described earlier in the Data section. Using the 2000 census boundaries as the unit of analysis, there are 483 treated units and 16,249 controls. The mean difference in 2000 poverty index between treated and all control segments is 6.732 (stand. err. = 0.238;  $p < 0.01$ ). The estimates based on matching are -2.390 without calipers (stand. err. = 0.442;  $p < 0.01$ ) with calipers and -1.611 with calipers (stand. err. = 0.359;  $p < 0.01$ ). Thirty-seven treated segments are dropped using the calipers. See table S13 for

---

<sup>†</sup> When we improve balance by matching with calipers, the estimate decreases by more than 80 percent, and is no longer significantly different from zero ( $p < 0.10$ ); a post-matching regression estimates reduces the estimate by more than 60 percent.

covariate balance, and table S14 for tests for hidden bias for this analysis. Table S14 indicates that the estimates of the impact of protection for these Costa Rica census data are slightly more robust to potential hidden bias than the estimates reported in the main text. The lower half of table S14 shows that for the confidence interval for the estimate from these data to include a finding of moderate size that protection exacerbates poverty,  $\Gamma$  must be greater than 5.1.

*Including protected areas established later (Costa Rica and Thailand):* We estimate the treatment effects of protected areas established before 2000. Table S15 presents the estimates.

*Varying the threshold of protection (Costa Rica and Thailand):* We vary the threshold criterion for defining a treated unit from 20% to 50%. Tables S16a and 16b present the matching estimates, including the 10% threshold estimates from Table S7 and Fig 1 for reference.

*Testing for the presence of spillovers into control units (Costa Rica and Thailand):* Households in census tracts or subdistricts that are close to treated units might also be positively or negatively affected by protected areas. If such spillovers are negative, they can make it appear as though protection alleviates poverty. If they are positive, they can mask some of the impact of protection in treated units because poverty was also alleviated in some control units as a result of protected areas. To explore these possibilities, we take two approaches. Both approaches assume that if spillovers exist, they are a decreasing function of distance from protected area boundaries (i.e., the closer a unit is to the protected area, the more affected it would be by the protected area). The first approach removes from the control group any units that could be contaminated by spillovers. We re-estimate the treatment effects after excluding all control units within 10 km of a protected area. The results, in the first two columns of Table S17 (“exclusion check”), are similar to those in Table S7. We then directly estimated local spillovers by matching control units located within 5 km of a protected area to control units farther away from protected areas.

This second approach (“estimation check”) aims to directly measure spillovers by comparing outcomes in control units “close” to protected areas with matched control units “far” from protected areas: in other words, we take the sample of control units and redefine treatment as having a protected area located within a specified distance from the unit but not in the unit itself. These results yield small values that are not statistically different from zero (columns 3 and 4 of Table S17). Based on the signs of the estimates (and estimates using a 2 km buffer, not reported here), the results indicate that to the extent that socioeconomic spillovers to surrounding communities exist, these spillovers are positive; i.e., control units near protected areas experience reduced poverty as a result of their proximity to protected areas. Thus, if spillovers are present, they are likely biasing our estimates towards zero, making it harder to detect a poverty alleviation effect and implying our estimates may somewhat underestimate the poverty reduction impacts of protection. Testing hypotheses in a separate regression framework by including a spatial lag measuring distance to protected area yields a similar conclusion.

*Changing the set of control units (Costa Rica and Thailand):* We vary the rule that control units must have less than 1% of their area overlapping with protected areas (results available upon request). Inferences regarding effects of protection on poverty and population do not change with these changes in the rule.

**Table S1.** Descriptive statistics for Costa Rica dataset (N = 4691).

| <b>Name</b>                                       | <b>Description</b>                                                                                                                                                                                                                                                                                                                                                                                                                                                                     | <b>Mean</b> | <b>Standard deviation</b> | <b>Minimum Maximum</b> |
|---------------------------------------------------|----------------------------------------------------------------------------------------------------------------------------------------------------------------------------------------------------------------------------------------------------------------------------------------------------------------------------------------------------------------------------------------------------------------------------------------------------------------------------------------|-------------|---------------------------|------------------------|
| <i>Proportion of segment under forest in 1960</i> | Total forest area in the segment in 1960 divided by total area of the segment                                                                                                                                                                                                                                                                                                                                                                                                          | 0.160       | 0.284                     | 0.000<br>1.000         |
| <i>High Productivity Land (proportion)</i>        | Percent of segment area under the land classes I, II, and III, measured in km <sup>2</sup><br>Class I: Agricultural Production – annual crops;<br>Class II: Suitable for agricultural production requiring special land and crop management practices such as water conservation, fertilization, irrigation, etc.;<br>Class III: Suitable for agricultural production requiring special land and crop management practices such as water conservation, fertilization, irrigation, etc. | 0.288       | 0.404                     | 0.000<br>1.000         |
| <i>Medium Productivity Land (proportion)</i>      | Percent of segment area under the land class IV, measured in km <sup>2</sup><br>Class IV: Moderately suitable for agricultural production; permanent or semi-permanent crops such as fruit trees, sugar cane, coffee, ornamental plants, etc.                                                                                                                                                                                                                                          | 0.421       | 0.454                     | 0.000<br>1.000         |
| <i>Medium-low Productivity Land (proportion)</i>  | Percent of segment area under the land classes V, VI, and VII, measured in km <sup>2</sup><br>Class V: Strong limitations for agriculture; forestry or pastureland<br>Class VI: Strong limiting factors on agricultural production; land is only suitable for forest plantations or natural forest management<br>Class VII: Strong limiting factors on agricultural production; land is only suitable for forest plantations or natural forest management                              | 0.209       | 0.354                     | 0.000<br>1.000         |
| <i>Low Productivity Land (proportion)</i>         | Percent of segment area under the land classes VIII and IX, measured in km <sup>2</sup><br>Class VIII: Land is suitable only for watershed protection<br>Class IX: Land is suitable only for protection                                                                                                                                                                                                                                                                                | 0.078       | 0.219                     | 0.000<br>1.000         |
| <i>Protected before 1980 (proportion)</i>         | Proportion of the segment area that was protected before 1980                                                                                                                                                                                                                                                                                                                                                                                                                          | 0.024       | 0.114                     | 0.000<br>1.000         |
| <i>Segment area (km<sup>2</sup>)</i>              | Total land area of segment (in square km)                                                                                                                                                                                                                                                                                                                                                                                                                                              | 10713.088   | 32455.426                 | 4.660<br>862683.313    |
| <i>Roadless Volume (km<sup>3</sup>)</i>           | The sum of the product of area and distance to nearest road (1969) for every square of length 100m within the segment                                                                                                                                                                                                                                                                                                                                                                  | 162.224     | 911.764                   | 0.000<br>33970.148     |
| <i>Distance to city (km)</i>                      | Distance from centroid of the segment to closest major city (Limon, Puntarenas, or San Jose), measured in km                                                                                                                                                                                                                                                                                                                                                                           | 38.276      | 39.529                    | 0.029<br>214.906       |
| <i>Distance to road</i>                           | Distance from centroid of the segment to nearest road (1969) measured in km                                                                                                                                                                                                                                                                                                                                                                                                            | 4.520       | 8.328                     | 0.000<br>62.656        |
| <i>Poverty index in 1973</i>                      | Multidimensional index of poverty derived from a linear combination of a set of key socioeconomic variables (see Outcome section for detailed)                                                                                                                                                                                                                                                                                                                                         | 6.462       | 9.556                     | -16.133<br>28.855      |

|                                                                | description and table S3 for list of variables)                                                                                                                                               |         |          |                   |
|----------------------------------------------------------------|-----------------------------------------------------------------------------------------------------------------------------------------------------------------------------------------------|---------|----------|-------------------|
| <i>Poverty index in 2000</i>                                   | Multidimensional index of poverty derived from a linear combination of a set of key socioeconomic variables (see Outcome section for detailed description and table S3 for list of variables) | -6.469  | 5.193    | -16.390<br>23.290 |
| <i>Population in 1973</i>                                      | Total number of residents in segment in 1973                                                                                                                                                  | 398.904 | 133.912  | 28<br>1527        |
| <i>Population in 2000</i>                                      | Total number of residents in segment in 2000                                                                                                                                                  | 811.291 | 1255.309 | 1.000<br>26169    |
| <i>Population Density in 1973 (Persons per km<sup>2</sup>)</i> | Total number of residents in segment in 1973 divided by segment area                                                                                                                          | 4.630   | 8.169    | 0.000<br>64.721   |
| <i>Population Density in 2000 (Persons per km<sup>2</sup>)</i> | Total number of residents in segment in 2000 divided by segment area                                                                                                                          | 3.957   | 5.720    | 0.000<br>44.072   |
| <i>Population growth 1973-2000</i>                             | Difference in segment population in 2000 and segment population in 1973 divided by segment population in 1973                                                                                 | 1.098   | 3.765    | -0.981<br>85.838  |

**Table S2.** Summary statistics and data sources for Thailand dataset (N = 3671).

| <b>Name</b>                  | <b>Description</b>                                                         | <b>Source</b>                                                                 | <b>Mean</b> | <b>Sd</b> | <b>Min</b> | <b>Max</b> |
|------------------------------|----------------------------------------------------------------------------|-------------------------------------------------------------------------------|-------------|-----------|------------|------------|
| Poverty headcount ratio      | Share of population with estimated consumption below poverty line          | Healy and Jitsuchon 2007; data is measured for the year 2000                  | 0.215       | 0.130     | 0.000      | 0.953      |
| Poverty gap                  | Mean distance estimated consumption to poverty line                        |                                                                               | 0.049       | 0.038     | 0.000      | 0.397      |
| Population density           | People per square km                                                       |                                                                               | 105.9       | 103.7     | 0.321      | 3778       |
| Protected                    | Coded as 1 if more than 10% in National Park or Wildlife Sanctuary by 1985 | IUCN World Database on Protected Areas                                        | 0.052       | 0.223     | 0          | 1          |
| Avg. slope                   | Average slope of land (deg)                                                | NIMA's Digital Terrain Elevation Data                                         | 1.018       | 2.042     | 0.000      | 14.33      |
| Avg. elevation               | Average elevation in meters                                                | GTOPO30/ USGS Global GIS (1999)                                               | 217.5       | 161.2     | 18.35      | 1159       |
| Maximum slope                | Maximum slope (deg.)                                                       |                                                                               | 4.050       | 6.990     | 0.000      | 46.99      |
| Max. elevation               | Maximum elevation in meters                                                |                                                                               | 319.3       | 316.4     | 21.075     | 2435       |
| Distance to major city       | Distance to nearest major city (pop > 100,000)                             | ESRI World Cities (2000)                                                      | 85.59       | 44.51     | 10.05      | 222.6      |
| Distance to major road ('62) | Distance to major road in km, 1962                                         | digitized East Asia Road Map, U.S. Map Service (1964); data from 1962         | 5.26        | 6.22      | 0.002      | 76.16      |
| Distance to any road ('62)   | Distance to minor road, 1962 road map in km                                |                                                                               | 10.42       | 9.577     | 0.002      | 88.08      |
| Forest cover ('73)           | Percent forest cover, 1973 from TRFIC/NASA satellite data                  | Tropical Rain Forest Info. Center / NASA Landsat Multi Spectral Scanner (MSS) | 0.194       | 0.315     | 0.000      | 1.000      |
| Distance to rail line        | Distance to rail line (km)                                                 | Vector Map Level 0 / USGS Global GIS (1997)                                   | 55.05       | 45.76     | 0.015      | 222.1      |
| Distance to major river (km) | Distance to major river (km) (flow accumulation > 5000)                    | USGS EROS Data Center, Hydro 1k dataset                                       | 21.61       | 16.61     | 0.010      | 97.82      |
| Near watershed boundary      | less than 1 km from boundary major watershed                               |                                                                               | 0.461       | 0.499     | 0          | 1          |
| Dist. mineral deposits       | Distance to mineral deposits (km)                                          | Mineral Resource Data System (MRDS)/ USGS Global GIS                          | 119.46      | 84.73     | 1.371      | 376.4      |
| Distance Thai border         | Distance to Thai border in km                                              | Vector Map Level 0 / USGS Global GIS (1997)                                   | 91.62       | 52.36     | 0.062      | 218.9      |
| Temperature                  | Avg. monthly temperature (°C)                                              | Ministry of Transp. of Thailand / Marc Souris (IRD)                           | 25.37       | 1.448     | 18.07      | 27.85      |
| Rainfall                     | Avg. monthly rainfall (mm)                                                 |                                                                               | 1064        | 225.3     | 375.8      | 2308       |
| Ecoregion 2                  | Percent tropical and sub-tropical coniferous forest                        | WWF Conservation Science Program / USGS Global GIS                            | 0.004       | 0.048     | 0.000      | 1.000      |
| Ecoregion 3                  | Percent tropical and sub-tropical dry broadleaf forest                     |                                                                               | 0.728       | 0.408     | 0.000      | 1.000      |
| Northeast                    | 1 = northeast region                                                       | Thai NSO classification                                                       | 0.667       | 0.471     | 0          | 1          |

**Table S3.** Variables used to calculate poverty indexes for 1973 and 2000 (Costa Rica).

| <b>Variable</b>                      | <b>Description</b>                                                                                       |
|--------------------------------------|----------------------------------------------------------------------------------------------------------|
| <i>Male</i>                          | Percentage of men in total population                                                                    |
| <i>Dependency ratio</i>              | Dependency ratio (children aged < 15 and people aged >65 divided by remainder of the population)         |
| <i>Employed</i>                      | Percentage of people who are employed compared with the economically active population                   |
| <i>Illiterate</i>                    | Percentage of illiterate population aged 10+                                                             |
| <i>Adult primary or no education</i> | Percentage of adult population (18+) with educational attainment of primary level or no formal education |
| <i>No toilet</i>                     | Percentage of dwellings without toilet                                                                   |
| <i>No hot water</i>                  | Percentage of dwellings without access to hot water                                                      |
| <i>Use coal or wood</i>              | Percentage of households that cook with charcoal or wood                                                 |
| <i>Dirt floor</i>                    | Percentage of dwellings with dirt floor                                                                  |
| <i>House in bad conditions</i>       | Percentage of dwellings in bad condition                                                                 |
| <i>No washing machine</i>            | Percentage of dwellings without washing machine                                                          |
| <i>No electricity</i>                | Percentage of dwellings without electricity                                                              |
| <i>No telephone</i>                  | Percentage of dwellings without telephone                                                                |
| <i>No refrigerator</i>               | Percentage of dwellings without refrigerator                                                             |
| <i>No water system</i>               | Percentage of dwellings without connection to private or public water system                             |
| <i>No sewage</i>                     | Percentage of dwellings without indoor plumbing                                                          |
| <i>Crowding</i>                      | Percentage of dwellings with 3 or more occupants per bedroom                                             |

**Table S4.** Number of protected areas in the analysis, by IUCN Category.

| <i>IUCN Category</i> | <b>Costa Rica</b> |                  | <b>Thailand</b> |                  |
|----------------------|-------------------|------------------|-----------------|------------------|
|                      | <i>Pre-1980</i>   | <i>1981-2000</i> | <i>Pre-1985</i> | <i>1986-2000</i> |
| <i>Ia/Ib</i>         | 4                 | 3                | 15              | 16               |
| <i>II</i>            | 17                | 8                | 22              | 33               |
| <i>III</i>           | 0                 | 0                | 0               | 0                |
| <i>IV</i>            | 1                 | 66               | 0               | 0                |
| <i>V</i>             | 0                 | 0                | 0               | 0                |
| <i>VI</i>            | 17                | 25               | 0               | 0                |

**Table S5.** Covariate balance: Matching without calipers (Costa Rica).

| Covariate                                                    | Sample    | Mean Value Treated Segments | Mean Value Control Segments* | Diff in Mean Values | Mean eQQ Diff** | Median eQQ Diff** | Max eQQ Diff** | Mean eCDF Diff^ |
|--------------------------------------------------------------|-----------|-----------------------------|------------------------------|---------------------|-----------------|-------------------|----------------|-----------------|
| <i>Poverty Index in 1973</i>                                 | Unmatched | 15.050                      | 5.377                        | 9.673               | 9.687           | 9.774             | 19.258         | 0.304           |
|                                                              | Matched   | 15.050                      | 15.237                       | -0.187              | 1.640           | 1.541             | 3.523          | 0.073           |
| <i>Proportion of segment under forest in 1960</i>            | Unmatched | 0.523                       | 0.117                        | 0.406               | 0.405           | 0.455             | 0.769          | 0.451           |
|                                                              | Matched   | 0.523                       | 0.488                        | 0.035               | 0.035           | 0.033             | 0.087          | 0.036           |
| <i>High Productivity Land (proportion)</i>                   | Unmatched | 0.092                       | 0.304                        | -0.211              | 0.212           | 0.000             | 0.871          | 0.191           |
|                                                              | Matched   | 0.092                       | 0.120                        | -0.027              | 0.030           | 0.012             | 0.155          | 0.079           |
| <i>Medium Productivity Land (proportion)</i>                 | Unmatched | 0.209                       | 0.453                        | -0.244              | 0.245           | 0.073             | 0.799          | 0.211           |
|                                                              | Matched   | 0.209                       | 0.200                        | 0.009               | 0.026           | 0.014             | 0.149          | 0.036           |
| <i>Medium-Low Productivity Land (proportion)<sup>▫</sup></i> | Unmatched | 0.233                       | 0.196                        | 0.037               | 0.102           | 0.050             | 0.368          | 0.130           |
|                                                              | Matched   | 0.233                       | 0.243                        | -0.010              | 0.034           | 0.021             | 0.135          | 0.046           |
| <i>Roadless Volume (km<sup>3</sup>)</i>                      | Unmatched | 1113.100                    | 66.820                       | 1046.28             | 1035.300        | 156.440           | 28799.000      | 0.363           |
|                                                              | Matched   | 1113.100                    | 681.500                      | 431.6               | 440.880         | 25.083            | 28799.000      | 0.687           |
| <i>Distance to City (km)</i>                                 | Unmatched | 58.530                      | 34.865                       | 23.665              | 23.624          | 23.107            | 42.112         | 0.196           |
|                                                              | Matched   | 58.530                      | 57.563                       | 0.967               | 5.281           | 3.923             | 24.942         | 0.036           |

▫ Low productivity land is the omitted category.

\* Values for matched controls are weighted means.

\*\* Mean/Median/Maximum Raw eQQ = mean/.median/maximum difference in the empirical quantile-quantile plot of treatment and control groups on the scale in which the variable is measured. The mean difference is reported for categorical productivity variables.

^ Mean eCDF= mean differences in empirical cumulative distribution functions

**Table S6.** Covariate Balance: Matching without calipers (Thailand).

| Covariate                                          | Sample    | Mean Value Treated Sub-districts | Mean Value Control Sub-districts | Diff in Mean Values | Mean eQQ Diff** | Median eQQ Diff** | Max eQQ Diff** | Mean eCDF Diff^ |
|----------------------------------------------------|-----------|----------------------------------|----------------------------------|---------------------|-----------------|-------------------|----------------|-----------------|
| <i>Average slope (degrees)</i>                     | Unmatched | 5.089                            | 0.793                            | 4.296               | 4.278           | 4.517             | 6.600          | 0.561           |
|                                                    | Matched   | 5.089                            | 4.750                            | 0.339               | 0.534           | 0.588             | 1.010          | 0.056           |
| <i>Average elevation (m)</i>                       | Unmatched | 514.790                          | 201.120                          | 313.670             | 311.750         | 301.170           | 525.850        | 0.390           |
|                                                    | Matched   | 514.790                          | 470.920                          | 43.870              | 50.603          | 42.872            | 121.040        | 0.057           |
| <i>Maximum slope (degrees)</i>                     | Unmatched | 19.233                           | 3.213                            | 16.020              | 15.935          | 17.304            | 22.304         | 0.567           |
|                                                    | Matched   | 19.233                           | 16.092                           | 3.141               | 3.066           | 2.766             | 16.105         | 0.091           |
| <i>Maximum elevation (m)</i>                       | Unmatched | 1006.600                         | 281.400                          | 725.200             | 722.000         | 781.070           | 1034.900       | 0.435           |
|                                                    | Matched   | 1006.600                         | 922.130                          | 84.470              | 93.961          | 84.217            | 627.010        | 0.058           |
| <i>Distance to Navigable River (km)</i>            | Unmatched | 30.335                           | 21.126                           | 9.209               | 9.120           | 9.375             | 20.042         | 0.135           |
|                                                    | Matched   | 30.335                           | 29.841                           | 0.494               | 3.255           | 2.527             | 31.207         | 0.042           |
| <i>Percent forest cover (1973)</i>                 | Unmatched | 0.704                            | 0.165                            | 0.538               | 0.537           | 0.627             | 0.871          | 0.508           |
|                                                    | Matched   | 0.704                            | 0.632                            | 0.072               | 0.077           | 0.016             | 0.262          | 0.055           |
| <i>Distance to major city (km)</i>                 | Unmatched | 98.355                           | 84.880                           | 13.475              | 16.838          | 17.747            | 40.015         | 0.116           |
|                                                    | Matched   | 98.355                           | 96.515                           | 1.840               | 8.786           | 7.285             | 30.275         | 0.068           |
| <i>Dist. major road pre-treatment (1962) (km)</i>  | Unmatched | 17.780                           | 10.012                           | 7.768               | 7.583           | 6.368             | 23.548         | 0.174           |
|                                                    | Matched   | 17.780                           | 17.031                           | 0.749               | 1.788           | 1.341             | 24.275         | 0.033           |
| <i>Dist. to any road pre-treatment (1962) (km)</i> | Unmatched | 12.414                           | 4.862                            | 7.552               | 7.408           | 6.406             | 28.958         | 0.238           |
|                                                    | Matched   | 12.414                           | 13.102                           | -0.688              | 1.602           | 0.917             | 15.479         | 0.033           |
| <i>Distance to Thai national border (km)</i>       | Unmatched | 79.535                           | 92.281                           | -12.746             | 12.811          | 11.185            | 32.806         | 0.068           |
|                                                    | Matched   | 79.535                           | 82.776                           | -3.241              | 8.135           | 5.288             | 47.451         | 0.034           |
| <i>Near watershed boundary</i>                     | Unmatched | 0.823                            | 0.441                            | 0.382               | 0.380           | 0.000             | 1.000          | 0.191           |
|                                                    | Matched   | 0.823                            | 0.849                            | -0.026              | 0.025           | 0.000             | 1.000          | 0.013           |
| <i>Distance to railroad</i>                        | Unmatched | 72.946                           | 54.064                           | 18.882              | 23.009          | 22.669            | 76.803         | 0.152           |
|                                                    | Matched   | 72.946                           | 66.076                           | 6.870               | 9.350           | 8.236             | 23.004         | 0.060           |
| <i>Distance to mineral deposits</i>                | Unmatched | 80.312                           | 121.620                          | -41.308             | 41.837          | 33.885            | 142.780        | 0.145           |
|                                                    | Matched   | 80.312                           | 69.733                           | 10.579              | 10.833          | 9.591             | 41.031         | 0.067           |
| <i>Avg. temperature</i>                            | Unmatched | 23.358                           | 25.481                           | -2.123              | 2.109           | 2.235             | 3.397          | 0.362           |
|                                                    | Matched   | 23.358                           | 23.627                           | -0.269              | 0.322           | 0.304             | 0.791          | 0.056           |
| <i>Avg. rainfall</i>                               | Unmatched | 1023.500                         | 1066.200                         | -42.700             | 57.826          | 34.839            | 705.160        | 0.056           |
|                                                    | Matched   | 1023.500                         | 1001.900                         | 21.600              | 25.365          | 15.344            | 371.200        | 0.033           |
| <i>Pct ecoregion 2</i>                             | Unmatched | 0.029                            | 0.003                            | 0.026               | 0.025           | 0.000             | 0.714          | 0.046           |
|                                                    | Matched   | 0.029                            | 0.011                            | 0.018               | 0.018           | 0.000             | 0.585          | 0.033           |
| <i>Pct ecoregion 3</i>                             | Unmatched | 0.571                            | 0.736                            | -0.165              | 0.164           | 0.000             | 0.633          | 0.172           |
|                                                    | Matched   | 0.571                            | 0.604                            | -0.033              | 0.053           | 0.000             | 0.272          | 0.053           |
| <i>Northeast region</i>                            | Unmatched | 0.396                            | 0.682                            | -0.286              | 0.286           | 0.000             | 1.000          | 0.143           |
|                                                    | Matched   | 0.396                            | 0.396                            | 0.000               | 0.000           | 0.000             | 0.000          | 0.000           |

\*\* Mean/Median/Maximum Raw eQQ = mean/.median/maximum difference in the empirical quantile-quantile plot of treatment and control groups on the scale in which the variable is measured. The mean difference is reported for categorical productivity variables.

^ Mean eCDF= mean differences in empirical cumulative distribution functions

**Table S7.** Estimated impacts of protected areas on poverty in 2000

| <i>Outcome</i>                               | <i>Poverty Index</i><br><i>(Costa Rica)</i> ^ | <i>Poverty Headcount Ratio</i><br><i>(Thailand)</i> # | <i>Poverty Gap</i><br><i>(Thailand)</i> # |
|----------------------------------------------|-----------------------------------------------|-------------------------------------------------------|-------------------------------------------|
| <i>Conventional Estimates</i>                |                                               |                                                       |                                           |
| <i>Difference in Means</i> †                 | 5.526***<br>(0.315)                           | 0.019**<br>(0.010)                                    | 0.007**<br>(0.003)                        |
| <i>Matching Estimates</i>                    |                                               |                                                       |                                           |
| <i>Matching</i> ‡                            | -1.278**<br>(0.524)                           | -0.079***<br>(0.015)                                  | -0.024***<br>(0.005)                      |
| <i>Matching with calipers</i> ‡ <sup>▫</sup> | -1.349***<br>(0.480)                          | -0.054***<br>(0.011)                                  | -0.017***<br>(0.004)                      |
| <i>[N treated dropped by calipers]</i>       | [22]                                          | [48]                                                  | [48]                                      |
| N treated                                    | 249                                           | 192                                                   | 192                                       |
| (N available controls)                       | (4164)                                        | (3479)                                                | (3479)                                    |

^ Average treatment effect on the treated of more than 10% of the segment protected before 1980.  
 # Average treatment effect on the treated of more than 10% of the sub-district protected before 1985.  
 † A t-test of the difference in means between treated and control segments.  
 ‡ For Costa Rica, Mahalanobis covariate matching is used. For Thailand, nearest-neighbor propensity score matching with exact matching on district is used. Robust standard errors are in parenthesis under estimate.  
 ▫ Calipers restrict matches to units within 1 standard deviation of each covariate.  
 \*\*\* and \*\* indicate significance at 1% and 5% levels, respectively.

**Table S8.** Tests for sensitivity to hidden bias: Critical p-values and upper bound confidence intervals for matching estimates (Costa Rica).

|          | <b>1</b>                                                   | <b>2</b>                                          |
|----------|------------------------------------------------------------|---------------------------------------------------|
|          | <b>Poverty Index<br/>(Matching without calipers)</b>       | <b>Poverty Index<br/>(Matching with calipers)</b> |
| $\Gamma$ | <i>Critical p-values for treatment effects<sup>†</sup></i> |                                                   |
| 1.1      | 0.210                                                      | 0.044                                             |
| 1.2      |                                                            | 0.139                                             |
|          | <i>Upper bound 95% confidence interval</i>                 |                                                   |
| 3.4      | 3.309                                                      |                                                   |
| 3.7      |                                                            | 3.112                                             |

<sup>†</sup> Test of the null of zero effect.

**Table S9a.** Tests for sensitivity to hidden bias: Critical p-values and upper bound confidence intervals for matching estimates (Thailand: Poverty headcount outcome).

|          | <b>1</b>                                                          | <b>2</b>                      |
|----------|-------------------------------------------------------------------|-------------------------------|
|          | <b>Matching without calipers</b>                                  | <b>Matching with calipers</b> |
| <b>Γ</b> | <b><i>Critical p-values for treatment effects<sup>†</sup></i></b> |                               |
| 1.1      | 0.001                                                             | 0.005                         |
| 1.2      | 0.007                                                             | 0.016                         |
| 1.3      | 0.023                                                             | 0.041                         |
| 1.4      | 0.060                                                             | 0.087                         |
| 1.5      | 0.125                                                             | 0.156                         |
|          | <b><i>Upper bound 95% confidence interval</i></b>                 |                               |
| 6.8      | 0.090                                                             |                               |
| 5.5      |                                                                   | 0.089                         |

<sup>†</sup> Test of the null of zero effect.

**Table S9b.** Tests for sensitivity to hidden bias: critical p-values and upper bound confidence intervals for matching estimates (Thailand: Poverty gap outcome).

|          | <b>1</b>                                                          | <b>2</b>                      |
|----------|-------------------------------------------------------------------|-------------------------------|
|          | <b>Matching without calipers</b>                                  | <b>Matching with calipers</b> |
| <b>Γ</b> | <b><i>Critical p-values for treatment effects<sup>†</sup></i></b> |                               |
| 1.1      | 0.000                                                             | 0.001                         |
| 1.2      | 0.002                                                             | 0.005                         |
| 1.3      | 0.006                                                             | 0.016                         |
| 1.4      | 0.020                                                             | 0.038                         |
| 1.5      | 0.048                                                             | 0.077                         |
| 1.6      | 0.099                                                             | 0.136                         |
| 1.7      | 0.174                                                             |                               |
|          | <b><i>Upper bound 95% confidence interval</i></b>                 |                               |
| 7.2      | 0.032                                                             |                               |
| 5.4      |                                                                   | 0.031                         |

<sup>†</sup> Test of the null of zero effect.

**Table S10.** Post-matching weighted regression estimates: Estimated impacts of protected areas on poverty in 2000 (Costa Rica).

|                                              | 1                                | 2                                |
|----------------------------------------------|----------------------------------|----------------------------------|
| <b>Outcome</b>                               | <b>Poverty Index<sup>^</sup></b> | <b>Poverty Index<sup>▫</sup></b> |
|                                              | <b>(Costa Rica)</b>              | <b>(Costa Rica)</b>              |
| <i>Matching without calipers<sup>‡</sup></i> | -0.815                           | -0.858                           |
| <i>(N=498)</i>                               |                                  |                                  |
| <i>Matching with calipers<sup>‡▫</sup></i>   | -1.126                           | -0.974                           |
| <i>(N=454)</i>                               |                                  |                                  |

<sup>^</sup> Regression on matched covariates only

<sup>▫</sup> Regression on modified set of covariates (see full description in SOM text)

**Table S11.** Post-matching weighted regression estimates with matching covariates: Estimated impacts of protected areas (Thailand).

|                                                                                       | 1                                                   | 2                                       |
|---------------------------------------------------------------------------------------|-----------------------------------------------------|-----------------------------------------|
| <b>Outcome</b>                                                                        | <b>Poverty<br/>Headcount Ratio #<br/>(Thailand)</b> | <b>Poverty<br/>Gap #<br/>(Thailand)</b> |
| <i>Post-matching estimates (no district fixed effects)</i><br>(N <sup>†</sup> =394)   | -0.064                                              | -0.020                                  |
| <i>Post-matching estimates (with district fixed effects)</i><br>(N <sup>†</sup> =394) | -0.045                                              | -0.014                                  |

<sup>#</sup> Regression on matched covariates.

<sup>†</sup> N reflects the number of treated observations available for matching. There are three instances of ties; weights are used to correct for the fact that these three treated observations appear more than once in the matched data set

**Table S12. Estimated impacts of protected areas on population in 2000.**

|                                              | 1                                                          | 2                                                         | 3                                                        |
|----------------------------------------------|------------------------------------------------------------|-----------------------------------------------------------|----------------------------------------------------------|
| <b>Outcome</b>                               | <b>Population<br/>Density<sup>^</sup><br/>(Costa Rica)</b> | <b>Population<br/>Growth<sup>^</sup><br/>(Costa Rica)</b> | <b>Population<br/>Density<sup>#</sup><br/>(Thailand)</b> |
| <i>Conventional Estimate</i>                 |                                                            |                                                           |                                                          |
| <i>Difference in Means<sup>†</sup></i>       | -4.278***<br>(0.374)                                       | 0.443*<br>(0.250)                                         | -68.724***<br>(7.602)                                    |
| <i>Matching Estimates</i>                    |                                                            |                                                           |                                                          |
| <i>Matching without calipers<sup>‡</sup></i> | -0.175<br>(0.125)                                          | -1.865***<br>(0.676)                                      | -0.573<br>(3.920)                                        |
| <i>Matching with calipers<sup>‡</sup>▫</i>   | -0.173<br>(0.124)                                          | -0.363<br>(0.315)                                         | -1.240<br>(3.104)                                        |
| <i>[N treated dropped by calipers]</i>       | [21]                                                       | [28]                                                      | [48]                                                     |
| N treated                                    | 249                                                        | 249                                                       | 192                                                      |
| (N available controls)                       | (4164)                                                     | (4164)                                                    | (3479)                                                   |

<sup>^</sup> Average treatment effect on the treated of more than 10% of the segment protected before 1980. Population density is calculated in persons per square km (population density = total population / segment area in km). Population growth is calculated as the relative change in population between 1973 and 2000 (Population growth = (Population in 2000 – Population in 1973)/Population in 1973).

<sup>#</sup> Average treatment effect on the treated of more than 10% of the sub-district protected by 1985.

<sup>†</sup> A t-test of the difference in means between treated and control segments.

<sup>‡</sup> For Costa Rica, covariate matching on the Mahalanobis distance metric is used. For Thailand, nearest neighbor propensity score matching with exact matching on district is used. Robust standard errors are in parenthesis under estimate (Abadie & Imbens).

▫ For Costa Rica and Thailand, calipers restrict matches to units within 1 standard deviation of each covariate.

\*\*\*, \*\*, \* indicate significance at 1%, 5%, 10% respectively.

**Table S13.** Covariate balance: Poverty index outcome, matching without calipers, using disaggregated segment boundaries (Costa Rica).

| <b>Covariate</b>                                             | <b>Sample</b> | <b>Mean Value Treated Segments</b> | <b>Mean Value Control Segments*</b> | <b>Diff in Mean Values</b> | <b>Mean eQQ Diff**</b> | <b>Median eQQ Diff**</b> | <b>Max eQQ Diff**</b> | <b>Mean eCDF Diff^</b> |
|--------------------------------------------------------------|---------------|------------------------------------|-------------------------------------|----------------------------|------------------------|--------------------------|-----------------------|------------------------|
| <i>Poverty Index in 1973</i>                                 | Unmatched     | 13.641                             | 6.573                               | 7.068                      | 7.079                  | 6.469                    | 18.353                | 0.274                  |
|                                                              | Matched       | 13.641                             | 13.962                              | -0.321                     | 0.495                  | 0.403                    | 1.959                 | 0.024                  |
| <i>Proportion of segment under forest in 1960</i>            | Unmatched     | 0.512                              | 0.138                               | 0.374                      | 0.373                  | 0.377                    | 0.866                 | 0.379                  |
|                                                              | Matched       | 0.512                              | 0.512                               | 0.000                      | 0.010                  | 0.005                    | 0.062                 | 0.012                  |
| <i>High Productivity Land (proportion)</i>                   | Unmatched     | 0.079                              | 0.345                               | -0.266                     | 0.267                  | 0.000                    | 0.989                 | 0.252                  |
|                                                              | Matched       | 0.079                              | 0.102                               | -0.023                     | 0.023                  | 0.000                    | 0.186                 | 0.028                  |
| <i>Medium Productivity Land (proportion)</i>                 | Unmatched     | 0.170                              | 0.413                               | -0.243                     | 0.243                  | 0.000                    | 0.912                 | 0.222                  |
|                                                              | Matched       | 0.170                              | 0.170                               | 0.000                      | 0.013                  | 0.000                    | 0.103                 | 0.017                  |
| <i>Medium-Low Productivity Land (proportion)<sup>▫</sup></i> | Unmatched     | 0.223                              | 0.194                               | 0.029                      | 0.089                  | 0.002                    | 0.378                 | 0.110                  |
|                                                              | Matched       | 0.223                              | 0.209                               | 0.014                      | 0.020                  | 0.000                    | 0.116                 | 0.030                  |
| <i>Roadless Volume (km<sup>3</sup>)</i>                      | Unmatched     | 441.99                             | 22.838                              | 419.152                    | 416.35                 | 64.081                   | 19641                 | 0.347                  |
|                                                              | Matched       | 441.99                             | 285.21                              | 156.78                     | 157.30                 | 15.748                   | 19641                 | 0.053                  |
| <i>Distance to City (km)</i>                                 | Unmatched     | 58.048                             | 35.490                              | 22.558                     | 22.510                 | 21.750                   | 48.079                | 0.175                  |
|                                                              | Matched       | 58.048                             | 56.477                              | 1.571                      | 5.182                  | 3.398                    | 24.281                | 0.034                  |

▫ Low productivity land is the omitted category.

\* Values for matched controls are weighted means.

\*\* Mean/Median/Maximum Raw eQQ = mean/median/maximum difference in the empirical quantile-quantile plot of treatment and control groups on the scale in which the variable is measured. The mean difference is reported for categorical productivity variables.

^ Mean eCDF= mean differences in empirical cumulative distribution functions

**Table S14.** Tests for sensitivity to hidden bias: Critical p-values and upper bound confidence intervals for matching estimates using disaggregated segment boundaries (Costa Rica).

|          | <b>1</b>                                                   | <b>2</b>                                          |
|----------|------------------------------------------------------------|---------------------------------------------------|
|          | <b>Poverty Index<br/>(Matching without calipers)</b>       | <b>Poverty Index<br/>(Matching with calipers)</b> |
| $\Gamma$ | <i>Critical p-values for treatment effects<sup>†</sup></i> |                                                   |
| 1.1      | 0.004                                                      | 0.111                                             |
| 1.2      | 0.035                                                      |                                                   |
| 1.3      | 0.146                                                      |                                                   |
|          | <i>Upper bound 95% confidence interval</i>                 |                                                   |
| 5.1      |                                                            | 4.226                                             |
| 6        | 4.520                                                      |                                                   |

<sup>†</sup> Test of the null of zero effect.

**Table S15.** Estimated impacts of protected areas on poverty: all areas protected before 2000.

|                                              | 1                                                 | 2                                                         | 3                                             |
|----------------------------------------------|---------------------------------------------------|-----------------------------------------------------------|-----------------------------------------------|
| <b>Outcome</b>                               | <b>Poverty Index<sup>^</sup><br/>(Costa Rica)</b> | <b>Poverty Headcount Ratio<sup>#</sup><br/>(Thailand)</b> | <b>Poverty Gap<sup>#</sup><br/>(Thailand)</b> |
| <i>Conventional Estimate</i>                 |                                                   |                                                           |                                               |
| <i>Difference in Means<sup>†</sup></i>       | 5.873***<br>(0.257)                               | 0.018***<br>(0.006)                                       | 0.008***<br>(0.002)                           |
| <i>Matching Estimates</i>                    |                                                   |                                                           |                                               |
| <i>Matching without calipers<sup>‡</sup></i> | -1.000**<br>(0.442)                               | -0.051***<br>(0.013)                                      | -0.013***<br>(0.005)                          |
| <i>Matching with calipers<sup>‡</sup>▫</i>   | -1.158***<br>(0.405)                              | -0.045***<br>(0.010)                                      | -0.012***<br>(0.004)                          |
| <i>[N treated dropped by calipers]</i>       | [35]                                              | [70]                                                      | [70]                                          |
| N treated                                    | 393                                               | 471                                                       | 471                                           |
| (N available controls)                       | (4164)                                            | (3479)                                                    | (3479)                                        |

<sup>^</sup> Average treatment effect on the treated of more than 10% of the segment protected by 2000.

<sup>#</sup> Average treatment effect on the treated of more than 10% of the subdistrict protected by 2000.

<sup>†</sup> A t-test of the difference in means between treated and control segments.

<sup>‡</sup> For Costa Rica, covariate matching on the Mahalanobis distance metric is used. For Thailand, nearest neighbor propensity score matching with exact matching on district is used. Robust standard errors (Abadie & Imbens) are in parenthesis under estimate.

▫ Calipers restrict matches to units within 1 standard deviation of each covariate.

\*\*\* and \*\* indicate significance at 1% and 5%, respectively.

**Table S16a.** Varying thresholds of protection for defining treatment: Estimated impacts of protected areas on poverty in 2000, matching<sup>‡</sup> without calipers.

|                                           | 1                                                 | 2                                                         | 3                                             |
|-------------------------------------------|---------------------------------------------------|-----------------------------------------------------------|-----------------------------------------------|
| <b>Outcome</b>                            | <b>Poverty Index<sup>^</sup><br/>(Costa Rica)</b> | <b>Poverty Headcount Ratio<sup>#</sup><br/>(Thailand)</b> | <b>Poverty Gap<sup>#</sup><br/>(Thailand)</b> |
| <i>Treatment: More than 10% protected</i> | -1.278**<br>(0.524)                               | -0.079***<br>(0.015)                                      | -0.024***<br>(0.005)                          |
| <i>{N treated}</i>                        | {249}                                             | {192}                                                     | {192}                                         |
| <i>Treatment: More than 20% protected</i> | -1.513***<br>(0.535)                              | -0.078***<br>(0.018)                                      | -0.022***<br>(0.007)                          |
| <i>{N treated}</i>                        | {209}                                             | {156}                                                     | {156}                                         |
| <i>Treatment: More than 50% protected</i> | -1.600**<br>(0.642)                               | -0.076***<br>(0.024)                                      | -0.020**<br>(0.008)                           |
| <i>{N treated}</i>                        | {82}                                              | {61}                                                      | {61}                                          |

<sup>^</sup> Average treatment effect on the treated of more than 10%, 20%, or 50% of the segment protected before 1980.

<sup>#</sup> Average treatment effect on the treated of more than 10%, 20%, or 50% of the sub-district protected by 1985.

<sup>‡</sup> For Costa Rica, covariate matching on the Mahalanobis distance metric is used. For Thailand, nearest neighbor propensity score matching with exact matching on district is used. Robust standard errors are in parenthesis under estimate (Abadie & Imbens).

\*\*\* and \*\* indicate significance at 1% and 5%, respectively.

**Table S16b.** Varying thresholds of protection for defining treatment: Estimated impacts of protected areas on poverty in 2000, matching<sup>‡</sup> with calipers<sup>▪</sup>.

|                                           | 1                                                 | 2                                                         | 3                                             |
|-------------------------------------------|---------------------------------------------------|-----------------------------------------------------------|-----------------------------------------------|
| <b>Outcome</b>                            | <b>Poverty Index<sup>^</sup><br/>(Costa Rica)</b> | <b>Poverty Headcount Ratio<sup>^</sup><br/>(Thailand)</b> | <b>Poverty Gap<sup>^</sup><br/>(Thailand)</b> |
| <i>Treatment: More than 10% protected</i> | -1.349***<br>(0.480)                              | -0.054***<br>(0.011)                                      | -0.017***<br>(0.004)                          |
| <i>[N dropped by calipers]</i>            | [22]                                              | [48]                                                      | [48]                                          |
| <i>{N treated}</i>                        | {249}                                             | {192}                                                     | {192}                                         |
| <i>Treatment: More than 20% protected</i> | -1.705***<br>(0.516)                              | -0.058***<br>(0.014)                                      | -0.018**<br>(0.005)                           |
| <i>[N dropped by calipers]</i>            | [20]                                              | [42]                                                      | [42]                                          |
| <i>{N treated}</i>                        | {209}                                             | {156}                                                     | {156}                                         |
| <i>Treatment: More than 50% protected</i> | -1.438**<br>(0.578)                               | -0.059***<br>(0.017)                                      | -0.017**<br>(0.007)                           |
| <i>[N dropped by calipers]</i>            | [11]                                              | [24]                                                      | [24]                                          |
| <i>{N treated}</i>                        | {82}                                              | {61}                                                      | {61}                                          |

<sup>^</sup> Average treatment effect on the treated of more than 10%, 20%, or 50% of the segment protected before 1980.

<sup>#</sup> Average treatment effect on the treated of more than 10%, 20%, or 50% of the sub-district protected by 1985.

<sup>‡</sup> For Costa Rica, covariate matching on the Mahalanobis distance metric is used. For Thailand, nearest neighbor propensity score matching with exact matching on district is used. Robust standard errors are in parenthesis under estimate (Abadie & Imbens).

<sup>▪</sup> Calipers restrict matches to units within 1 standard deviation of each covariate.

\*\*\* and \*\* indicate significance at 1% and 5%, respectively.

**Table S17. Robustness checks for spillover effects**

|                                           | <b>Exclusion Check<br/>(Costa Rica)</b>                                                                          | <b>Exclusion Check<br/>(Thailand)</b>                                                                            | <b>Estimation Check<br/>(Costa Rica)</b>                                                                       | <b>Estimation Check<br/>(Thailand)</b>                                                                         |
|-------------------------------------------|------------------------------------------------------------------------------------------------------------------|------------------------------------------------------------------------------------------------------------------|----------------------------------------------------------------------------------------------------------------|----------------------------------------------------------------------------------------------------------------|
|                                           | <b>Treatment is more than 10% protected and controls must be more than 10-km from any protected area by 2000</b> | <b>Treatment is more than 10% protected and controls must be more than 10-km from any protected area by 2000</b> | <b>Treated are units within 5-km of protection. All units with more than 1% protection before 2000 dropped</b> | <b>Treated are units within 5-km of protection. All units with more than 1% protection before 2000 dropped</b> |
| <i>Matching</i> <sup>†</sup>              | -1.232***<br>(0.442)                                                                                             | -0.0910***<br>(0.0160)                                                                                           | -0.019<br>(0.095)                                                                                              | -0.0319<br>(0.0246)                                                                                            |
| <i>Matching with caliper</i> <sup>‡</sup> | -1.504***<br>(0.367)                                                                                             | -0.0549***<br>(0.0113)                                                                                           | 0.011<br>(0.092)                                                                                               | -0.0348<br>(0.0244)                                                                                            |
| <i>[N treated dropped by calipers]</i>    | [34]                                                                                                             | [60]                                                                                                             | [21]                                                                                                           | [1]                                                                                                            |
| N treated                                 | 249                                                                                                              | 192                                                                                                              | 1546                                                                                                           | 53                                                                                                             |
| (N available controls)                    | (678)                                                                                                            | (3149)                                                                                                           | (2618)                                                                                                         | (3426)                                                                                                         |

<sup>^</sup> Outcome is poverty index for Costa Rica and poverty headcount ratio for Thailand.  
<sup>†</sup> For Costa Rica, Mahalanobis covariate matching is used. Robust standard errors are in parenthesis under estimate of average treatment effect. For Thailand, nearest-neighbor propensity score matching with exact matching on district is used. Robust standard errors are in parenthesis under estimate.  
<sup>‡</sup> Calipers restrict matches to units within 1 standard deviation of each covariate.  
\*\*\* and \*\* indicate significance at 1% and 5% levels, respectively.

## References

1. Reibel M (2007) Geographic information systems and spatial data processing in demography: A review. *Popul Res Policy Rev* 26, 601-618.
2. Tobler W (1979) Smooth pyconophylactic interpolation for geographical regions. *J Am Stat Assoc* 74, 519-536.
3. Ravallion M, Chen S, Sangruala P (2008) (The World Bank, Development Research Group, Washington, D.C.), Policy Research Working Paper 4620.
4. Chen S, Ravallion M (2008) (The World Bank, Development Research Group, Washington, D.C.) Policy Research Working Paper 4703.
5. Ravallion M (1996) Issues in measuring and modeling poverty. *Econ J* 106, 1328-44.
6. Cavatassi R, Davis B, Lipper L (2004) Estimating poverty over time and space: Construction of a time-variant poverty index for Costa Rica. (The Food and Agriculture Organization, Rome).
7. Filmer D, Pritchett L (1998) Estimating wealth effects without expenditure data - or tears: An application to educational enrollments in states of India. *Demography* 38, 115-132.
8. Skoufias E, Davis B, de la Vega S (2001) Targeting the poor in Mexico: An evaluation of the selection of households into PROGRESA. *World Dev* 29, 1769-1784.
9. Healy A, Jitsuchon S (2007) Finding the poor in Thailand. *J Asian Econ* 18, 739-759.
10. Elbers C, Lanjouw JO, Lanjouw P (2003) Micro-level estimation of poverty and inequality. *Econometrica* 71, 355-364.
11. Elbers C, Lanjouw P, Leite P (2008) *Brazil within Brazil: Testing the poverty map methodology in Minas Gerais* (World Bank, Washington, D.C.), World Bank Policy Research Series No. 4513.
12. Banerjee A, et al. (2006) *An Evaluation of World Bank Research 1998-2005* (World Bank, Washington, D.C.).
13. Lanjouw P, Ravallion M (2006) *Response to the Evaluation Panel's critique of poverty mapping* (World Bank, Washington, D.C.).
14. Foster J, Greer J, Thorbecke E (1984) A class of decomposable poverty measures. *Econometrica* 52, 761-766.
15. Evans S (1999) *The Green Republic: A Conservation History of Costa Rica* (University of Texas Press, Austin, Texas).
16. Sims KRE (2009) Conservation and development: Evidence from Thai protected areas. (Department of Economics, Amherst College).
17. Watts RD, et al. (2007) Roadless space of the conterminous United States. *Science* 4, 736-738.
18. Holdridge L (1967) *Lifeline Ecology* (Tropical Science Center, San Jose, Costa Rica).
19. Arroyo-Mora JP, et al. (2005) Dynamics in landscape structure and composition for the Chorotega region, Costa Rica from 1960 to 2000. *Agr Ecosyst Environ* 106, 27-39.
20. Pfaff A, Sanchez A (2004) Deforestation pressure and biological reserve planning: A conceptual approach and an illustrative application for Costa Rica. *Resour Energy Econ* 26, 237-254.
21. Imbens GW (2004) Nonparametric estimation of average treatment effects under exogeneity: A review. *Rev Econ Stat* 86, 4-29.
22. Rosenbaum PR, Rubin DB (1983) The central role of the propensity score in observational studies for causal effects. *Biometrika* 70, 41-55.

23. Rubin DB (1980) Bias reduction using Mahalanobis-metric matching. *Biometrics* 36, 293-298.
24. Ho D, Imai K, King G, Stuart E (2007) Matching as nonparametric preprocessing for reducing model dependence in parametric causal inference. *Political Anal* 15, 199-236.
25. Rosenbaum P (2002) *Observational Studies* (Springer-Verlag, New York).
26. Ichino A, Mealli F, Nannicini T (2008) From Temporary Help Jobs to Permanent Employment: What can we learn from matching estimators and their sensitivity? *J Appl Econ* 23, 305-327.
27. Cohen J (1988) *Statistical Power Analysis for the Behavioral Sciences* (Lawrence Erlbaum Associates, Hillsdale, NJ).
28. DiPrete TA, Gangl M (2004) Assessing bias in the estimation of causal effects: Rosenbaum bounds on matching estimators and instrumental variables estimation with imperfect instruments. *Sociol Methodol* 34, 271-310.
29. Gangl M (2004) *RBOUNDS: Stata module to perform Rosenbaum sensitivity analysis for average treatment effects on the treated*. (Social Science Centre, Berlin, Germany).
30. Abadie A, Imbens GW (2006) Large sample properties of matching estimators for average treatment effects. *Econometrica* 74, 235-267.
